# Supplementary material for: Reaction mechanism of the selective reduction of CO2 to CO by a tetraaza [CoIIN4H]2+ complex in the presence of protons
Source: Royal Society of Chemistry journal article supplement (doi:10.1039/c8cp01963k), 2018-01-01
Supplement: c8cp01963k1.pdf [file c8cp01963k1.pdf]

# Supplementary Information

---

## Reaction Mechanism of the Selective Reduction of CO<sub>2</sub> to CO by a Tetraaza [Co<sup>II</sup>N<sub>4</sub>H]<sup>2+</sup> Complex in the Presence of Protons.

Alejandro J. Garza<sup>a</sup>, Srimanta Pakhira<sup>b,c</sup>, Alexis T. Bell<sup>a,d</sup>, Jose L. Mendoza-Cortes<sup>a,b,c</sup>,  
Martin Head-Gordon<sup>a,e</sup>

<sup>a</sup>*The Joint Center for Artificial Photosynthesis, Lawrence Berkeley National Laboratory, Berkeley, CA 94720, USA.*

<sup>b</sup>*Department of Chemical & Biomedical Engineering, Florida A&M University and Florida State University, (FAMU-FSU) Joint College of Engineering, Tallahassee FL, 32310, USA.*

<sup>c</sup>*Department of Physics, Scientific Computing, Materials Science and Engineering Program, High Performance Material Institute, Condensed Matter Theory-National High Magnetic Field Laboratory, Florida State University, Tallahassee, FL 32310, USA.*

<sup>d</sup>*Department of Chemical and Biomolecular Engineering, University of California, Berkeley, CA 94720, USA*

<sup>e</sup>*Department of Chemistry, University of California, Berkeley, CA 94720, USA*

---

To whom correspondence should be addresses to:  
mendoza@eng.famu.fsu.edu  
mhg@cchem.berkeley.edu

# Contents

|                                                                | <b>Page</b> |
|----------------------------------------------------------------|-------------|
| Title . . . . .                                                | i           |
| List of Contents . . . . .                                     | ii          |
| 1 Geometries . . . . .                                         | 1           |
| 1.1 [CoIN4H] <sup>+2</sup> . . . . .                           | 1           |
| 1.2 TS-[CoIN4H]-CO2 Formation (Front) . . . . .                | 1           |
| 1.3 [CoIN4H]-CO2 (Front) . . . . .                             | 1           |
| 1.4 [CoIN4H]-CO2 (Back) . . . . .                              | 1           |
| 1.5 TS-[CoIN4H]-COO-H <sup>+</sup> (Front) . . . . .           | 1           |
| 1.6 [CoIN4H]-COOH (Front) . . . . .                            | 2           |
| 1.7 TS-[CoIN4H]-COOH-H <sup>+</sup> (Front) . . . . .          | 2           |
| 1.8 [CoIN4H]-HCOOH (Front) . . . . .                           | 2           |
| 1.9 TS-[CoIN4H]-COO-H <sub>2</sub> Formation (Front) . . . . . | 2           |
| 1.10 Formate + Catalyst (Front) . . . . .                      | 3           |
| 1.11 TS-[CoIN4H]-Formate Formation (Front) . . . . .           | 3           |
| 1.12 TS-[CoIN4H]-Bicarbonate Formation (Front) . . . . .       | 3           |

## 1 Geometries

### 1.1 [CoIN4H]<sup>2+</sup>

|    |    |             |             |             |    |   |             |             |             |
|----|----|-------------|-------------|-------------|----|---|-------------|-------------|-------------|
| 1  | N  | 0.04648500  | -0.07670200 | 0.02420900  | 9  | H | 3.33735400  | -0.30983300 | 1.90500100  |
| 2  | C  | -0.01514100 | -0.08658900 | 1.41794500  | 10 | H | 1.20888200  | -0.13077500 | 3.17006800  |
| 3  | C  | 1.05204900  | 0.02699200  | -2.05003900 | 11 | H | 1.96327000  | -0.85765200 | -3.79434400 |
| 4  | C  | 1.26375600  | -0.02984800 | -0.65566800 | 12 | C | -1.57059600 | 0.11181400  | -0.88394000 |
| 5  | C  | 2.44851900  | -0.03288000 | 0.07734800  | 13 | C | -1.34733500 | 0.16561100  | 1.86761700  |
| 6  | C  | 1.17174200  | -0.08990000 | 2.14764200  | 14 | N | -0.39909200 | 0.13149900  | -2.39805900 |
| 7  | C  | 2.40360500  | -0.06781200 | 1.47833500  | 15 | C | 1.98518400  | -0.02878700 | -3.14881500 |
| 8  | H  | 3.40673700  | -0.00220700 | -0.43159900 | 16 | N | -3.28550000 | 0.46807400  | -1.86631200 |
| 9  | H  | 3.32726400  | -0.06703400 | 2.04796300  | 17 | N | -2.26007900 | 0.26032600  | 0.89678900  |
| 10 | H  | 1.14662400  | -0.10339700 | 3.23274700  | 18 | C | -1.67451500 | 0.22419300  | 3.33215200  |
| 11 | H  | 2.09518200  | 0.99549400  | -3.69119400 | 19 | C | -0.75493900 | 0.29041800  | -3.80949300 |
| 12 | Co | -1.46977600 | -0.06078600 | -0.91033600 | 20 | H | 1.88599200  | -0.90424100 | -3.80264000 |
| 13 | C  | -1.35684700 | -0.07921900 | 1.85593000  | 21 | H | 2.97131500  | -0.07502300 | -2.68569700 |
| 14 | N  | -0.26775600 | 0.01430500  | -2.38125600 | 22 | C | -4.33566200 | 1.13573000  | -1.07617600 |
| 15 | C  | 2.16564700  | 0.10337300  | -3.05458300 | 23 | C | -3.13556400 | 1.03847600  | -3.21718200 |
| 16 | N  | -3.17370300 | -0.20901900 | -1.96406500 | 24 | H | -3.55593200 | -0.52393000 | -1.97291700 |
| 17 | N  | -2.24556600 | -0.07271100 | 0.82524100  | 25 | C | -3.64510700 | 0.49556000  | 1.31039000  |
| 18 | C  | -1.75561600 | -0.06870700 | 3.30372500  | 26 | H | -2.20182300 | 1.14940100  | 3.59492500  |
| 19 | C  | -0.59311000 | 0.16957500  | -3.79241400 | 27 | H | -2.31995600 | -0.60991500 | 3.63431200  |
| 20 | H  | 2.18543700  | -0.76524000 | -3.72801300 | 28 | H | -0.77005600 | 0.17645500  | 3.93930600  |
| 21 | H  | 3.13339400  | 0.14088400  | -2.55175100 | 29 | C | -2.24886800 | 0.13856000  | -4.07852100 |
| 22 | C  | -4.40153200 | 0.25011100  | -1.26976900 | 30 | H | -0.21725500 | -0.43946500 | -4.42771700 |
| 23 | C  | -3.11736800 | 0.29890000  | -3.35677400 | 31 | H | -0.43049800 | 1.28697300  | -4.14992000 |
| 24 | H  | -3.24746000 | -1.22779000 | -2.03371300 | 32 | H | -5.24393700 | 1.23882300  | -1.68867700 |
| 25 | C  | -3.65349000 | 0.03779600  | 1.17420100  | 33 | H | -4.00231800 | 2.14935000  | -0.81788700 |
| 26 | H  | -2.37962500 | 0.79792600  | 3.55996100  | 34 | C | -4.65370600 | 0.32267200  | 0.17897200  |
| 27 | H  | -2.32503300 | -0.96439800 | 3.59011700  | 35 | H | -4.12699200 | 1.13641400  | -3.68435300 |
| 28 | H  | -0.87264500 | -0.03174400 | 3.94384800  | 36 | H | -2.71469300 | 2.04942400  | -3.13776100 |
| 29 | C  | -1.98528200 | -0.34633700 | -4.14854400 | 37 | H | -3.72921100 | 1.51865900  | 1.71057700  |
| 30 | H  | 0.12757600  | -0.35867300 | -4.42935600 | 38 | H | -3.92454100 | -0.18110300 | 2.12786800  |
| 31 | H  | -0.53446100 | 1.23268600  | -4.08456200 | 39 | H | -2.42346500 | 0.36996400  | -5.13534500 |
| 32 | H  | -5.27138100 | 0.06483700  | -1.91734300 | 40 | H | -2.54780000 | -0.90411200 | -3.92310500 |
| 33 | H  | -4.32304700 | 1.33374600  | -1.13028400 | 41 | H | -4.72323800 | -0.73591100 | -0.09488100 |
| 34 | C  | -4.58890300 | -0.45275700 | 0.07016500  | 42 | H | -5.63684800 | 0.62225700  | 0.55926300  |
| 35 | H  | -4.08110800 | 0.10322700  | -3.85023800 | 43 | C | -1.89380100 | -1.89882100 | -0.98883500 |
| 36 | H  | -2.98857000 | 1.38585500  | -3.31367600 | 44 | O | -0.99566700 | -2.53950300 | -0.47377100 |
| 37 | H  | -3.91265800 | 1.08730600  | 1.40078800  | 45 | O | -2.96680300 | -2.15696000 | -1.56659800 |
| 38 | H  | -3.88826600 | -0.53282100 | 2.08204500  |    |   |             |             |             |
| 39 | H  | -2.16223700 | -0.15847400 | -5.21415800 |    |   |             |             |             |
| 40 | H  | -2.02389100 | -1.43657500 | -4.01504300 |    |   |             |             |             |
| 41 | H  | -4.46723300 | -1.53634800 | -0.06784500 |    |   |             |             |             |
| 42 | H  | -5.62376300 | -0.29672200 | 0.39697000  |    |   |             |             |             |

### 1.4 [CoIN4H]-CO<sub>2</sub> (Back)

|    |   |             |             |             |    |   |             |             |             |
|----|---|-------------|-------------|-------------|----|---|-------------|-------------|-------------|
| 1  | N | 0.02112800  | -0.06833700 | 0.01333400  | 2  | C | 0.02632300  | -0.09108800 | 1.38091300  |
| 2  | C | 0.87326600  | 0.00091300  | -2.13209900 | 3  | C | 1.17139900  | -0.09018700 | -0.72633000 |
| 4  | C | 1.17139900  | -0.09018700 | -0.72633000 | 4  | C | 2.40127100  | -0.19178200 | -0.07496500 |
| 5  | C | 2.40127100  | -0.19178200 | -0.07496500 | 6  | C | 1.24083800  | -0.19370400 | 2.06042800  |
| 6  | C | 1.24083800  | -0.19370400 | 2.06042800  | 7  | C | 2.42937200  | -0.25015400 | 1.32315600  |
| 7  | C | 2.42937200  | -0.25015400 | 1.32315600  | 8  | H | 3.32719400  | -0.21907100 | -0.63839200 |
| 8  | H | 3.32719400  | -0.21907100 | -0.63839200 | 9  | H | 3.38039600  | -0.32711500 | 1.83979800  |
| 9  | H | 3.38039600  | -0.32711500 | 1.83979800  | 10 | H | 1.27047800  | -0.22098200 | 3.14398200  |
| 10 | H | 1.27047800  | -0.22098200 | 3.14398200  | 11 | H | 1.89628700  | 0.10250400  | -3.74215600 |
| 11 | H | 1.89628700  | 0.10250400  | -3.74215600 | 12 | C | -1.56528600 | 0.13789200  | -0.85695200 |
| 12 | C | -1.56528600 | 0.13789200  | -0.85695200 | 13 | C | -1.31786700 | 0.01138300  | 1.89030200  |
| 13 | C | -1.31786700 | 0.01138300  | 1.89030200  | 14 | N | -0.43365500 | 0.04721300  | -2.39711900 |
| 14 | N | -0.43365500 | 0.04721300  | -2.39711900 | 15 | C | 1.95197400  | 0.07513000  | -3.17645900 |
| 15 | C | 1.95197400  | 0.07513000  | -3.17645900 | 16 | N | -3.30363400 | -0.30503300 | -1.81803900 |
| 16 | N | -3.30363400 | -0.30503300 | -1.81803900 | 17 | N | -2.23461700 | 0.09641400  | 0.92473100  |
| 17 | N | -2.23461700 | 0.09641400  | 0.92473100  | 18 | C | -1.62175800 | 0.04253400  | 3.36262400  |
| 18 | C | -1.62175800 | 0.04253400  | 3.36262400  | 19 | C | -0.85854100 | 0.27035100  | -3.77516200 |
| 19 | C | -0.85854100 | 0.27035100  | -3.77516200 | 20 | H | 1.88507600  | -0.74734400 | -3.89944700 |
| 20 | H | 1.88507600  | -0.74734400 | -3.89944700 | 21 | H | 2.94098500  | 0.02817500  | -2.71963200 |
| 21 | H | 2.94098500  | 0.02817500  | -2.71963200 | 22 | C | -4.56220100 | 0.03001600  | -1.10341900 |
| 22 | C | -4.56220100 | 0.03001600  | -1.10341900 | 23 | C | -3.36706200 | 0.19930300  | -3.21275500 |
| 23 | C | -3.36706200 | 0.19930300  | -3.21275500 | 24 | H | -3.27095100 | -1.32536900 | -1.88025100 |
| 24 | H | -3.27095100 | -1.32536900 | -1.88025100 | 25 | C | -3.63575300 | 0.30012600  | 1.27322700  |
| 25 | C | -3.63575300 | 0.30012600  | 1.27322700  | 26 | H | -2.12823500 | 0.97038500  | 3.65243700  |
| 26 | H | -2.12823500 | 0.97038500  | 3.65243700  | 27 | H | -2.26790400 | -0.79028000 | 3.66660100  |
| 27 | H | -2.26790400 | -0.79028000 | 3.66660100  | 28 | H | -0.70461800 | -0.02629800 | 3.94873300  |
| 28 | H | -0.70461800 | -0.02629800 | 3.94873300  | 29 | C | -2.22849300 | -0.33651700 | -4.07572100 |
| 29 | C | -2.22849300 | -0.33651700 | -4.07572100 | 30 | H | -0.13560200 | -0.14150900 | -4.48785300 |
| 30 | H | -0.13560200 | -0.14150900 | -4.48785300 | 31 | H | -0.90062200 | 1.35504700  | -3.95637400 |
| 31 | H | -0.90062200 | 1.35504700  | -3.95637400 | 32 | H | -5.41217300 | -0.40060300 | -1.65375700 |
| 32 | H | -5.41217300 | -0.40060300 | -1.65375700 | 33 | H | -4.64826300 | 1.11749800  | -1.12549300 |
| 33 | H | -4.64826300 | 1.11749800  | -1.12549300 | 34 | C | -4.57797500 | -0.46428000 | 0.33948400  |
| 34 | C | -4.57797500 | -0.46428000 | 0.33948400  | 35 | H | -4.33023600 | -0.08849300 | -3.66002900 |
| 35 | H | -4.33023600 | -0.08849300 | -3.66002900 | 36 | H | -3.33539400 | 1.29005200  | -3.14933700 |
| 36 | H | -3.33539400 | 1.29005200  | -3.14933700 | 37 | H | -3.85290500 | 1.37368800  | 1.19299500  |
| 37 | H | -3.85290500 | 1.37368800  | 1.19299500  | 38 | H | -3.84017600 | -0.00507000 | 2.30438800  |
| 38 | H | -3.84017600 | -0.00507000 | 2.30438800  | 39 | H | -2.46896800 | -0.12459000 | -5.12424200 |
| 39 | H | -2.46896800 | -0.12459000 | -5.12424200 | 40 | H | -2.17531800 | -1.43113600 | -3.98661300 |
| 40 | H | -2.17531800 | -1.43113600 | -3.98661300 | 41 | H | -4.34988700 | -1.53874000 | 0.38224400  |
| 41 | H | -4.34988700 | -1.53874000 | 0.38224400  | 42 | H | -5.60051900 | -0.34849700 | 0.71876500  |
| 42 | H | -5.60051900 | -0.34849700 | 0.71876500  | 43 | C | -1.62290300 | 2.15398500  | -0.94080100 |
| 43 | C | -1.62290300 | 2.15398500  | -0.94080100 | 44 | O | -2.80693600 | 2.48228600  | -1.07770600 |
| 44 | O | -2.80693600 | 2.48228600  | -1.07770600 | 45 | O | -0.53399100 | 2.69444000  | -0.85699200 |
| 45 | O | -0.53399100 | 2.69444000  | -0.85699200 |    |   |             |             |             |

### 1.5 TS-[CoIN4H]-COO-H<sup>+</sup> (Front)

|    |    |             |             |             |    |    |             |             |             |
|----|----|-------------|-------------|-------------|----|----|-------------|-------------|-------------|
| 1  | N  | 0.00432700  | 0.01719800  | -0.00744000 | 1  | N  | 0.00432700  | 0.01719800  | -0.00744000 |
| 2  | C  | 0.00615900  | 0.02522800  | 1.33834700  | 2  | C  | 0.00615900  | 0.02522800  | 1.33834700  |
| 3  | C  | 0.83784800  | 0.01233000  | -2.16876900 | 3  | C  | 0.83784800  | 0.01233000  | -2.16876900 |
| 4  | C  | 1.13938300  | -0.03753900 | -0.72745200 | 4  | C  | 1.13938300  | -0.03753900 | -0.72745200 |
| 5  | C  | 2.37709300  | -0.10971200 | -0.08409500 | 5  | C  | 2.37709300  | -0.10971200 | -0.08409500 |
| 6  | C  | 1.21133900  | -0.04238100 | 2.03933600  | 6  | C  | 1.21133900  | -0.04238100 | 2.03933600  |
| 7  | C  | 2.40148700  | -0.11685800 | 1.31187300  | 7  | C  | 2.40148700  | -0.11685800 | 1.31187300  |
| 8  | H  | 3.29996600  | -0.16528700 | -0.64796200 | 8  | H  | 3.29996600  | -0.16528700 | -0.64796200 |
| 9  | H  | 3.34977100  | -0.17868900 | 1.83435600  | 9  | H  | 3.34977100  | -0.17868900 | 1.83435600  |
| 10 | H  | 1.23084400  | -0.04536800 | 3.12207500  | 10 | H  | 1.23084400  | -0.04536800 | 3.12207500  |
| 11 | H  | 2.91387200  | -0.08836000 | -2.74534000 | 11 | H  | 2.91387200  | -0.08836000 | -2.74534000 |
| 12 | Co | -1.61117200 | 0.01274700  | -0.89118200 | 12 | Co | -1.61117200 | 0.01274700  | -0.89118200 |
| 13 | C  | -1.36956000 | 0.12150600  | 1.85633000  | 13 | C  | -1.36956000 | 0.12150600  | 1.85633000  |
| 14 | N  | -0.44105000 | 0.05747500  | -2.43989500 | 14 | N  | -0.44105000 | 0.05747500  | -2.43989500 |
| 15 | C  | 1.92539400  | 0.04157200  | -3.19995600 | 15 | C  | 1.92539400  | 0.04157200  | -3.19995600 |

|    |   |             |             |             |
|----|---|-------------|-------------|-------------|
| 16 | N | -3.34484300 | 0.22346300  | -1.84867000 |
| 17 | N | -2.28554100 | 0.14293700  | 0.92390500  |
| 18 | C | -1.65230300 | 0.20486600  | 3.32609000  |
| 19 | C | -0.83557200 | 0.19890600  | -3.85176500 |
| 20 | H | 1.81687300  | 0.90652000  | -3.86262000 |
| 21 | H | 1.88686900  | -0.85549800 | -3.82896600 |
| 22 | C | -4.44457000 | 0.82207200  | -1.05210100 |
| 23 | C | -3.24119200 | 0.82207400  | -3.20404800 |
| 24 | H | -3.58134700 | -0.76511700 | -1.98604900 |
| 25 | C | -3.68845200 | 0.30115800  | 1.34202300  |
| 26 | H | -2.29546100 | 1.05956000  | 3.55771300  |
| 27 | H | -2.17224100 | -0.69756900 | 3.66915100  |
| 28 | H | -0.73778700 | 0.30402500  | 3.90913000  |
| 29 | C | -2.32570600 | -0.01539900 | -4.09602900 |
| 30 | H | -0.26672600 | -0.50208800 | -4.47185200 |
| 31 | H | -0.55589300 | 1.21177800  | -4.17559200 |
| 32 | H | -5.35858200 | 0.83580500  | -1.65890100 |
| 33 | H | -4.19122800 | 1.86455500  | -0.82556600 |
| 34 | C | -4.68603600 | 0.01753800  | 0.22421500  |
| 35 | H | -4.24255300 | 0.87047600  | -3.64979300 |
| 36 | H | -2.87846700 | 1.85254300  | -3.10936800 |
| 37 | H | -3.82146500 | 1.33392300  | 1.69477200  |
| 38 | H | -3.90320900 | -0.35642600 | 2.19101900  |
| 39 | H | -2.52274200 | 0.24028800  | -5.14194600 |
| 40 | H | -2.57633600 | -1.07550500 | -3.98062700 |
| 41 | H | -4.69111500 | -1.05261200 | -0.01438000 |
| 42 | H | -5.68343100 | 0.25328700  | 0.60840600  |
| 43 | C | -1.71548900 | -2.11870700 | -0.87378900 |
| 44 | O | -0.87443400 | -2.58025100 | -0.13912500 |
| 45 | O | -2.62764600 | -2.41748500 | -1.62430200 |
| 46 | H | -1.20148200 | -4.75966700 | -0.26727100 |

## 1.6 [CoIN4H]-COOH (Front)

|    |    |             |             |             |
|----|----|-------------|-------------|-------------|
| 1  | N  | 0.03632000  | -0.14126600 | 0.00795400  |
| 2  | C  | 0.02344000  | -0.08148100 | 1.39403200  |
| 3  | C  | 0.93685200  | -0.03021000 | -2.11341900 |
| 4  | C  | 1.20486300  | 0.03293000  | -0.71932000 |
| 5  | C  | 2.40132400  | 0.26150000  | -0.04168800 |
| 6  | C  | 1.21690400  | 0.14724200  | 2.07718000  |
| 7  | C  | 2.40691600  | 0.31751500  | 1.35804700  |
| 8  | H  | 3.32456500  | 0.40428700  | -0.59320000 |
| 9  | H  | 3.33579400  | 0.50174900  | 1.88716000  |
| 10 | H  | 1.22612700  | 0.20149100  | 3.16062500  |
| 11 | H  | 1.77960700  | 0.96055400  | -3.84561800 |
| 12 | Co | -1.48693000 | -0.57595600 | -0.86689400 |
| 13 | C  | -1.29905500 | -0.24791000 | 1.88686600  |
| 14 | N  | -0.36690400 | -0.22930100 | -2.38788700 |
| 15 | C  | 1.99779500  | 0.12797600  | -3.16523800 |
| 16 | N  | -3.25226300 | -0.58780400 | -1.85458800 |
| 17 | N  | -2.20764100 | -0.40846700 | 0.90528300  |
| 18 | C  | -1.64263900 | -0.22791200 | 3.34907300  |
| 19 | C  | -0.73998300 | -0.23110400 | -3.80349200 |
| 20 | H  | 2.10102000  | -0.77179300 | -3.78543100 |
| 21 | H  | 2.97000100  | 0.32377700  | -2.71072000 |
| 22 | C  | -4.41506400 | -0.12533000 | -1.07296400 |
| 23 | C  | -3.22071900 | -0.00310300 | -3.20905800 |
| 24 | H  | -3.35028600 | -1.60805100 | -1.96821500 |
| 25 | C  | -3.60609400 | -0.51513700 | 1.32482000  |
| 26 | H  | -2.37295500 | 0.55512400  | 3.58835100  |
| 27 | H  | -2.07456200 | -1.17963700 | 3.68465700  |
| 28 | H  | -0.75455200 | -0.04195600 | 3.95477300  |
| 29 | C  | -2.16640900 | -0.70312300 | -4.06418500 |
| 30 | H  | -0.05838300 | -0.86372900 | -4.38709100 |
| 31 | H  | -0.62784400 | 0.79112700  | -4.19793100 |
| 32 | H  | -5.32549100 | -0.23162200 | -1.68166100 |
| 33 | H  | -4.29208200 | 0.94160300  | -0.85024500 |
| 34 | C  | -4.55222900 | -0.94503000 | 0.20890100  |
| 35 | H  | -4.21128900 | -0.11598500 | -3.67480100 |
| 36 | H  | -3.01754700 | 1.07165700  | -3.12781800 |
| 37 | H  | -3.93385300 | 0.46353600  | 1.70948700  |
| 38 | H  | -3.71221700 | -1.22466200 | 2.15590700  |
| 39 | H  | -2.38920700 | -0.52794300 | -5.12280300 |
| 40 | H  | -2.23873000 | -1.78415200 | -3.89917600 |
| 41 | H  | -4.39383500 | -2.00308900 | -0.02936100 |
| 42 | H  | -5.57755700 | -0.85402600 | 0.58494800  |
| 43 | C  | -1.50433200 | -2.48256000 | -0.97993100 |
| 44 | O  | -0.45490900 | -3.15717300 | -0.42377600 |
| 45 | O  | -2.37791200 | -3.15996800 | -1.50953800 |
| 46 | H  | 0.13673900  | -2.48508300 | -0.05290300 |

1.7 TS-[CoIN4H]-COOH-H<sup>+</sup> (Front)

|    |    |             |             |             |
|----|----|-------------|-------------|-------------|
| 1  | N  | -0.01141400 | 0.00586900  | -0.00112700 |
| 2  | C  | -0.00842200 | 0.00820100  | 1.34326500  |
| 3  | C  | 0.81851700  | -0.00670900 | -2.18815800 |
| 4  | C  | 1.10159100  | -0.18150000 | -0.73751400 |
| 5  | C  | 2.31557500  | -0.45544000 | -0.10427500 |
| 6  | C  | 1.17506900  | -0.26265100 | 2.03449300  |
| 7  | C  | 2.33647200  | -0.50757500 | 1.29443300  |
| 8  | H  | 3.22496500  | -0.61654300 | -0.67030800 |
| 9  | H  | 3.26663800  | -0.72374600 | 1.80978300  |
| 10 | H  | 1.20530600  | -0.27525700 | 3.11713700  |
| 11 | H  | 1.99841500  | 0.79858000  | -3.78561800 |
| 12 | Co | -1.59445100 | 0.46269600  | -0.88666000 |
| 13 | C  | -1.33851500 | 0.39678400  | 1.88445300  |
| 14 | N  | -0.42532600 | 0.28774000  | -2.45640200 |
| 15 | C  | 1.89595500  | -0.13296000 | -3.21699300 |
| 16 | N  | -3.16799700 | 1.25573000  | -1.80075200 |
| 17 | N  | -2.21880600 | 0.69382400  | 0.96865900  |
| 18 | C  | -1.58742300 | 0.48409700  | 3.35563100  |
| 19 | C  | -0.79279500 | 0.54589900  | -3.86580900 |
| 20 | H  | 1.65002500  | -0.92041100 | -3.93927100 |
| 21 | H  | 2.86366000  | -0.36895800 | -2.77806300 |
| 22 | C  | -3.93828300 | 2.19929700  | -0.93114800 |
| 23 | C  | -2.88532500 | 1.83438600  | -3.14794600 |
| 24 | H  | -3.78712500 | 0.45548700  | -1.95465500 |
| 25 | C  | -3.53264400 | 1.21165700  | 1.40928900  |

|    |   |             |             |             |
|----|---|-------------|-------------|-------------|
| 26 | H | -1.81323000 | 1.51647500  | 3.64922700  |
| 27 | H | -2.45510200 | -0.12364100 | 3.63586600  |
| 28 | H | -0.73545300 | 0.14415700  | 3.94175400  |
| 29 | C | -2.28440600 | 0.78018100  | -4.07459400 |
| 30 | H | -0.46001200 | -0.29423800 | -4.48512100 |
| 31 | H | -0.23193300 | 1.43002100  | -4.19694500 |
| 32 | H | -4.74978400 | 2.62884800  | -1.52799300 |
| 33 | H | -3.27998600 | 3.02554000  | -0.63798200 |
| 34 | C | -4.52275700 | 1.47012700  | 0.27614800  |
| 35 | H | -3.82625200 | 2.20664400  | -3.56659800 |
| 36 | H | -2.22080600 | 2.69754300  | -3.02752000 |
| 37 | H | -3.34239400 | 2.14855400  | 1.94957400  |
| 38 | H | -3.97492600 | 0.51319600  | 2.12768900  |
| 39 | H | -2.41711700 | 1.10386600  | -5.11124000 |
| 40 | H | -2.84155000 | -0.16026300 | -3.98205700 |
| 41 | H | -4.98553700 | 0.53281200  | -0.04892000 |
| 42 | H | -5.32999000 | 2.07973800  | 0.69278300  |
| 43 | C | -2.31434800 | -1.31527900 | -0.98546100 |
| 44 | O | -1.51509300 | -2.37800900 | -0.96115200 |
| 45 | O | -3.50860700 | -1.42239300 | -1.06005900 |
| 46 | H | -0.58034300 | -2.13961000 | -0.89923500 |
| 47 | H | -4.11502100 | -3.76041600 | -1.14309900 |

## 1.8 [CoIN4H]-HCOOH (Front)

|    |    |             |             |             |
|----|----|-------------|-------------|-------------|
| 1  | N  | 0.00752400  | -0.14953500 | 0.00105900  |
| 2  | C  | 0.00122500  | -0.07900000 | 1.35123300  |
| 3  | C  | 0.88410200  | -0.00618200 | -2.16368700 |
| 4  | C  | 1.15409400  | -0.12425700 | -0.71475400 |
| 5  | C  | 2.38797800  | -0.12887800 | -0.05912400 |
| 6  | C  | 1.20680100  | -0.08315400 | 2.05743800  |
| 7  | C  | 2.40436400  | -0.12596500 | 1.33831700  |
| 8  | H  | 3.31762600  | -0.11647700 | -0.61454100 |
| 9  | H  | 3.35164800  | -0.12855800 | 1.86703900  |
| 10 | H  | 1.22251800  | -0.03557800 | 3.13933000  |
| 11 | H  | 1.96626900  | 1.00644500  | -3.71568900 |
| 12 | Co | -1.62697300 | -0.11656100 | -0.91200200 |
| 13 | C  | -1.37083300 | 0.08320900  | 1.87768600  |
| 14 | N  | -0.38504600 | 0.08610400  | -2.45740800 |
| 15 | C  | 1.99247700  | 0.05658100  | -3.16957500 |
| 16 | N  | -3.31993900 | 0.34204000  | -1.86775000 |
| 17 | N  | -2.28539000 | 0.16182600  | 0.94897300  |
| 18 | C  | -1.64301800 | 0.20195000  | 3.34602200  |
| 19 | C  | -0.75801600 | 0.30376800  | -3.86671900 |
| 20 | H  | 1.89099000  | -0.74247500 | -3.91270600 |
| 21 | H  | 2.97478100  | -0.03915200 | -2.71031500 |
| 22 | C  | -4.31986900 | 1.07487400  | -1.03113400 |
| 23 | C  | -3.12073900 | 1.02394100  | -3.18396100 |
| 24 | H  | -3.75648100 | -0.55581600 | -2.08972300 |
| 25 | C  | -3.67601600 | 0.42303300  | 1.36244800  |
| 26 | H  | -2.09555800 | 1.17281800  | 3.57846100  |
| 27 | H  | -2.35000200 | -0.56775100 | 3.67532100  |
| 28 | H  | -0.73909700 | 0.10159900  | 3.94417800  |
| 29 | C  | -2.25674300 | 0.18567200  | -4.12246200 |
| 30 | H  | -0.22047500 | -0.40095500 | -4.51011100 |
| 31 | H  | -0.41905300 | 1.31082500  | -4.14559000 |
| 32 | H  | -5.21741600 | 1.24212000  | -1.63644500 |
| 33 | H  | -3.90669600 | 2.05863400  | -0.78389200 |
| 34 | C  | -4.68157700 | 0.28595400  | 0.22496600  |
| 35 | H  | -4.10455000 | 1.19232800  | -3.63542200 |
| 36 | H  | -2.67619900 | 2.00755300  | -2.99850600 |
| 37 | H  | -3.71422000 | 1.44556400  | 1.76203500  |
| 38 | H  | -3.95694100 | -0.24755000 | 2.18163400  |
| 39 | H  | -2.43705800 | 0.51352900  | -5.15061800 |
| 40 | H  | -2.57378700 | -0.86380100 | -4.08348400 |
| 41 | H  | -4.83374500 | -0.77004500 | -0.03055300 |
| 42 | H  | -5.64544300 | 0.64450000  | 0.59805800  |
| 43 | C  | -1.93490100 | -2.09585300 | -1.03319400 |
| 44 | O  | -1.18957300 | -3.08063000 | -0.58695300 |
| 45 | O  | -3.00503300 | -2.57090100 | -1.61782100 |
| 46 | H  | -0.38994300 | -2.75013800 | -0.14887800 |
| 47 | H  | -3.04308600 | -3.55287900 | -1.60994700 |

1.9 TS-[CoIN4H]-COO-H<sub>2</sub> Formation (Front)

|    |    |             |             |             |
|----|----|-------------|-------------|-------------|
| 1  | N  | 0.00988400  | -0.06710900 | -0.00088200 |
| 2  | C  | -0.00635600 | -0.07828800 | 1.34175500  |
| 3  | C  | 0.86178700  | -0.00576300 | -2.17354300 |
| 4  | C  | 1.14236200  | -0.12357600 | -0.72012500 |
| 5  | C  | 2.37307700  | -0.24186100 | -0.07078700 |
| 6  | C  | 1.19125400  | -0.19456000 | 2.05059700  |
| 7  | C  | 2.38403200  | -0.28688900 | 1.32672700  |
| 8  | H  | 3.30165600  | -0.29624400 | -0.62550800 |
| 9  | H  | 3.32718300  | -0.38305100 | 1.85429000  |
| 10 | H  | 1.20753900  | -0.21185400 | 3.13338300  |
| 11 | H  | 1.90433600  | 0.95109200  | -3.78527700 |
| 12 | Co | -1.62377500 | 0.02022300  | -0.91313600 |
| 13 | C  | -1.38725400 | 0.08191900  | 1.86340300  |
| 14 | N  | -0.40687200 | 0.08835500  | -2.46689400 |
| 15 | C  | 1.96545400  | 0.03839700  | -3.18226900 |
| 16 | N  | -3.33082900 | 0.37444700  | -1.87227000 |
| 17 | N  | -2.30264000 | 0.16307700  | 0.93626500  |
| 18 | C  | -1.66294600 | 0.17988100  | 3.33037600  |
| 19 | C  | -0.78657000 | 0.29983200  | -3.87817700 |
| 20 | H  | 1.88981500  | -0.80878200 | -3.874      |

|    |   |             |             |             |    |   |             |             |             |
|----|---|-------------|-------------|-------------|----|---|-------------|-------------|-------------|
| 34 | C | -4.70271000 | 0.27889400  | 0.20889900  | 17 | N | -2.26882500 | -0.31533100 | 0.92617400  |
| 35 | H | -4.14219500 | 1.17648800  | -3.65127000 | 18 | C | -1.63778900 | -0.11261000 | 3.31278100  |
| 36 | H | -2.72094600 | 2.02650500  | -3.04609000 | 19 | C | -0.78928200 | -0.04287800 | -3.89150400 |
| 37 | H | -3.74257800 | 1.43592500  | 1.75458200  | 20 | H | 2.93673900  | 0.30436900  | -2.72981400 |
| 38 | H | -3.97304400 | -0.26308900 | 2.16146300  | 21 | H | 1.74378300  | 0.95795000  | -3.85816000 |
| 39 | H | -2.46542700 | 0.49508200  | -5.16250300 | 22 | C | -4.42510600 | 0.22561100  | -1.06757400 |
| 40 | H | -2.60435800 | -0.86794900 | -4.07781400 | 23 | C | -3.24111800 | 0.28006500  | -3.22378600 |
| 41 | H | -4.84558300 | -0.77641500 | -0.05428600 | 24 | H | -3.56665600 | -1.34384400 | -2.03196800 |
| 42 | H | -5.66917400 | 0.62442800  | 0.58794200  | 25 | C | -3.68627000 | -0.24244200 | 1.34069800  |
| 43 | C | -1.85418600 | -2.06992100 | -0.99459900 | 26 | H | -2.31723500 | 0.72295000  | 3.51223700  |
| 44 | O | -0.99033700 | -2.77271500 | -0.46284400 | 27 | H | -2.13032000 | -1.02169900 | 3.67924900  |
| 45 | O | -2.84602600 | -2.52832300 | -1.57031900 | 28 | H | -0.73372800 | 0.03976200  | 3.89934600  |
| 46 | H | -1.63005700 | -3.98076300 | -0.80817800 | 29 | C | -2.24558400 | -0.41591400 | -4.14491100 |
| 47 | H | -2.46478500 | -3.89455200 | -1.30537800 | 30 | H | -0.13913100 | -0.65252300 | -4.52647700 |
|    |   |             |             |             | 31 | H | -0.62667500 | 1.00527700  | -4.17656400 |
|    |   |             |             |             | 32 | H | -5.32896900 | 0.21420100  | -1.68575300 |
|    |   |             |             |             | 33 | H | -4.18575500 | 1.27645600  | -0.86852300 |
|    |   |             |             |             | 34 | C | -4.67376200 | -0.55085900 | 0.22087000  |
|    |   |             |             |             | 35 | H | -4.24246600 | 0.24365600  | -3.66556700 |
|    |   |             |             |             | 36 | H | -2.98936900 | 1.33776300  | -3.08587800 |
|    |   |             |             |             | 37 | H | -3.86413800 | 0.77468600  | 1.71530600  |
|    |   |             |             |             | 38 | H | -3.85796100 | -0.92623800 | 2.17814200  |
|    |   |             |             |             | 39 | H | -2.47568100 | -0.13744900 | -5.17791500 |
|    |   |             |             |             | 40 | H | -2.38232400 | -1.50356300 | -4.09276500 |
|    |   |             |             |             | 41 | H | -4.69514100 | -1.62435400 | 0.01116300  |
|    |   |             |             |             | 42 | H | -5.67003600 | -0.29137700 | 0.59151100  |
|    |   |             |             |             | 43 | C | -1.50180700 | -2.35806300 | -0.71486400 |
|    |   |             |             |             | 44 | O | -0.55440100 | -2.90577300 | -0.21987700 |
|    |   |             |             |             | 45 | O | -2.70917500 | -2.93552900 | -0.91661700 |
|    |   |             |             |             | 46 | H | -2.64960000 | -3.87833800 | -0.66180700 |
|    |   |             |             |             | 47 | H | -1.00050300 | -2.56122700 | -2.58624800 |

### 1.10 Formate + Catalyst (Front)

|    |    |             |             |             |
|----|----|-------------|-------------|-------------|
| 1  | N  | -0.05061400 | -0.21301700 | -0.04215500 |
| 2  | C  | -0.04102300 | -0.25160200 | 1.34217200  |
| 3  | C  | 0.83030100  | -0.07684500 | -2.16112700 |
| 4  | C  | 1.12329400  | -0.18042900 | -0.77399300 |
| 5  | C  | 2.35185300  | -0.24318900 | -0.10928300 |
| 6  | C  | 1.18262100  | -0.31798800 | 2.01944000  |
| 7  | C  | 2.37410800  | -0.31782000 | 1.28842800  |
| 8  | H  | 3.28088900  | -0.22950400 | -0.66901000 |
| 9  | H  | 3.32516900  | -0.36807900 | 1.80944000  |
| 10 | H  | 1.20830700  | -0.36218900 | 3.10294700  |
| 11 | H  | 1.79354300  | 0.89054900  | -3.84882000 |
| 12 | Co | -1.61803900 | -0.11228100 | -0.90305400 |
| 13 | C  | -1.36866200 | -0.20280000 | 1.84161100  |
| 14 | N  | -0.50329400 | -0.04711300 | -2.41750600 |
| 15 | C  | 1.89482400  | -0.00218400 | -3.21850000 |
| 16 | N  | -3.36834800 | -0.27162500 | -1.85767700 |
| 17 | N  | -2.30443500 | -0.14681900 | 0.85311300  |
| 18 | C  | -1.69096600 | -0.19185600 | 3.30896200  |
| 19 | C  | -0.89867600 | 0.11617100  | -3.81202000 |
| 20 | H  | 1.88257200  | -0.87066500 | -3.89202100 |
| 21 | H  | 2.88517600  | 0.03541800  | -2.76195200 |
| 22 | C  | -4.55167500 | 0.23532900  | -1.12034900 |
| 23 | C  | -3.39589000 | 0.20037200  | -3.26250400 |
| 24 | H  | -3.46664900 | -1.29119100 | -1.88981900 |
| 25 | C  | -3.68868800 | 0.02946500  | 1.28144600  |
| 26 | H  | -2.26402200 | 0.69698400  | 3.60386400  |
| 27 | H  | -2.27902800 | -1.06683700 | 3.61868200  |
| 28 | H  | -0.77446900 | -0.19616000 | 3.90103400  |
| 29 | C  | -2.29281200 | -0.43332300 | -4.10606400 |
| 30 | H  | -0.19498100 | -0.38514800 | -4.48722600 |
| 31 | H  | -0.88009300 | 1.18455800  | -4.08676100 |
| 32 | H  | -5.45537100 | 0.06035100  | -1.72359400 |
| 33 | H  | -4.44168800 | 1.31972100  | -1.00761500 |
| 34 | C  | -4.70208300 | -0.43544300 | 0.23967100  |
| 35 | H  | -4.37885500 | -0.02855700 | -3.70155500 |
| 36 | H  | -3.29220100 | 1.29136600  | -3.25474700 |
| 37 | H  | -3.87889600 | 1.09334400  | 1.50322900  |
| 38 | H  | -3.89235800 | -0.51557800 | 2.21142300  |
| 39 | H  | -2.52166900 | -0.25870300 | -5.15881800 |
| 40 | H  | -2.30168400 | -1.52170500 | -3.95362900 |
| 41 | H  | -4.63793900 | -1.52358600 | 0.11268400  |
| 42 | H  | -5.70874300 | -0.22329800 | 0.61898200  |
| 43 | C  | -2.16273200 | -3.62493000 | -0.25934600 |
| 44 | O  | -1.89086700 | -4.69632400 | 0.21697000  |
| 45 | O  | -3.13125400 | -3.45494100 | -1.20598300 |
| 46 | H  | -3.49957700 | -4.33919900 | -1.38092300 |
| 47 | H  | -1.70602000 | -2.65195800 | -0.02865100 |

### 1.11 TS-[CoIN4H]-Formate Formation (Front)

|    |    |             |             |             |
|----|----|-------------|-------------|-------------|
| 1  | N  | 0.05643300  | -0.21808500 | -0.00881300 |
| 2  | C  | 0.04093400  | -0.21150800 | 1.33108000  |
| 3  | C  | 0.88539300  | -0.07671400 | -2.18386300 |
| 4  | C  | 1.18214700  | -0.13494600 | -0.73059600 |
| 5  | C  | 2.41915300  | -0.08251900 | -0.08387400 |
| 6  | C  | 1.24225900  | -0.15895300 | 2.04000100  |
| 7  | C  | 2.43671100  | -0.10861200 | 1.31389800  |
| 8  | H  | 3.34640500  | -0.02553000 | -0.64077900 |
| 9  | H  | 3.38487400  | -0.07802500 | 1.84038000  |
| 10 | H  | 1.26121100  | -0.15982200 | 3.12289600  |
| 11 | H  | 2.06556400  | -0.77571300 | -3.82523200 |
| 12 | Co | -1.57669500 | -0.42336900 | -0.91486400 |
| 13 | C  | -1.35015300 | -0.22897900 | 1.85015400  |
| 14 | N  | -0.38248100 | -0.18410000 | -2.47691400 |
| 15 | C  | 1.97028900  | 0.11725700  | -3.19443000 |
| 16 | N  | -3.30717300 | -0.36652500 | -1.87423900 |

### 1.12 TS-[CoIN4H]-Bicarbonate Formation (Front)

|    |    |             |             |             |
|----|----|-------------|-------------|-------------|
| 1  | N  | 0.05720500  | -0.11018200 | -0.01432000 |
| 2  | C  | 0.04762200  | -0.03806800 | 1.32798700  |
| 3  | C  | 0.88799000  | -0.00924900 | -2.19586600 |
| 4  | C  | 1.18573700  | -0.02451600 | -0.74137500 |
| 5  | C  | 2.42090600  | 0.08586700  | -0.09900400 |
| 6  | C  | 1.25061000  | 0.07139600  | 2.02855000  |
| 7  | C  | 2.44227400  | 0.11886500  | 1.29876900  |
| 8  | H  | 3.34515600  | 0.14877900  | -0.66021700 |
| 9  | H  | 3.39012300  | 0.19820200  | 1.82070900  |
| 10 | H  | 1.27052800  | 0.12174800  | 3.11024300  |
| 11 | H  | 2.94465200  | 0.33042000  | -2.75637800 |
| 12 | Co | -1.57005200 | -0.34197300 | -0.90582100 |
| 13 | C  | -1.33985200 | -0.04365200 | 1.85807300  |
| 14 | N  | -0.38015600 | -0.13094600 | -2.47987800 |
| 15 | C  | 1.96821600  | -0.18214200 | -3.21398100 |
| 16 | N  | -3.30713800 | -0.39432600 | -1.86250900 |
| 17 | N  | -2.26024800 | -0.15933200 | 0.94190100  |
| 18 | C  | -1.61811400 | 0.09999900  | 3.32088400  |
| 19 | C  | -0.80065900 | -0.02173100 | -3.89100000 |
| 20 | H  | 1.75490800  | 1.05114500  | -3.84594900 |
| 21 | H  | 2.03540500  | -0.68881400 | -3.87671800 |
| 22 | C  | -4.45631600 | 0.15765000  | -1.07589400 |
| 23 | C  | -3.26929100 | 0.20969100  | -3.23265000 |
| 24 | H  | -3.51805600 | -1.38892000 | -2.00125800 |
| 25 | C  | -3.67774700 | -0.11508400 | 1.35136800  |
| 26 | H  | -2.33996000 | 0.90171400  | 3.50591900  |
| 27 | H  | -2.05283100 | -0.82617100 | 3.71754400  |
| 28 | H  | -0.71786600 | 0.31839300  | 3.89270000  |
| 29 | C  | -2.23845800 | -0.47242400 | -4.12787100 |
| 30 | H  | -0.12580000 | -0.60233300 | -4.52790300 |
| 31 | H  | -0.69224800 | 1.03103300  | -4.18617600 |
| 32 | H  | -5.36336200 | 0.05251700  | -1.68033700 |
| 33 | H  | -4.28910700 | 1.23040800  | -0.92851500 |
| 34 | C  | -4.63456600 | -0.56919800 | 0.25408900  |
| 35 | H  | -4.26551100 | 0.10900500  | -3.67625000 |
| 36 | H  | -3.06786700 | 1.28183500  | -3.13153400 |
| 37 | H  | -3.90850100 | 0.92084500  | 1.63539000  |
| 38 | H  | -3.82454900 | -0.73333600 | 2.24231100  |
| 39 | H  | -2.48018000 | -0.24269600 | -5.17014400 |
| 40 | H  | -2.32590000 | -1.56186400 | -4.03508100 |
| 41 | H  | -4.56237100 | -1.65279100 | 0.10170500  |
| 42 | H  | -5.65079500 | -0.38538800 | 0.61575500  |
| 43 | C  | -1.55348500 | -2.57465500 | -0.57563400 |
| 44 | O  | -1.41964100 | -3.08156500 | 0.46497600  |
| 45 | O  | -2.64275400 | -3.24605700 | -1.75420600 |
| 46 | H  | -2.70812900 | -4.22086000 | -1.70108500 |
